# Supplementary material for: Loss of Aspm causes increased apoptosis of developing neural cells during mouse cerebral corticogenesis
Source: PubMed Central journal article supplement (PMC10686469; doi:10.1371/journal.pone.0294893), 2023-11-29

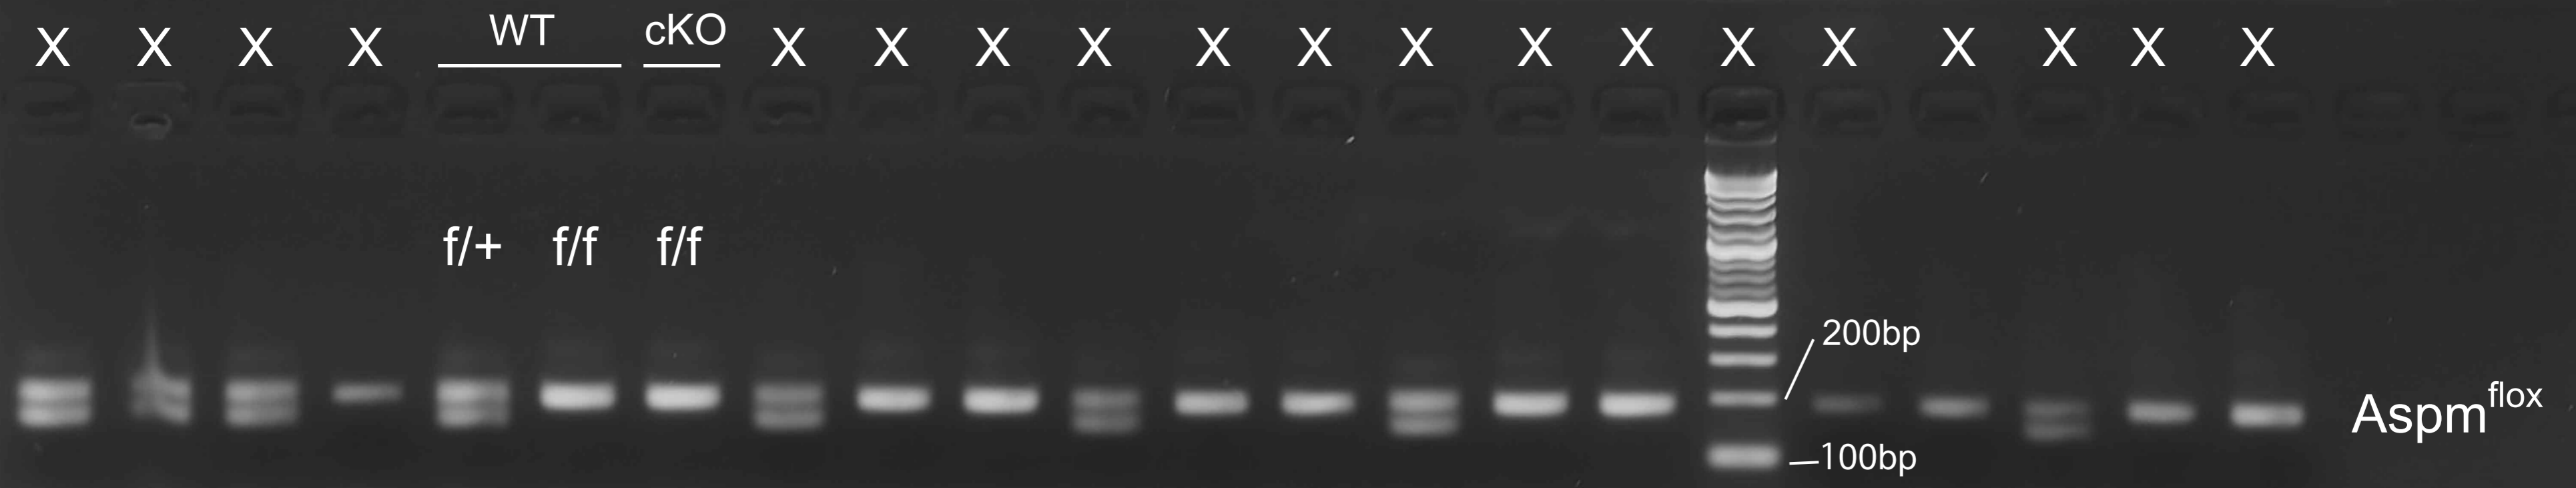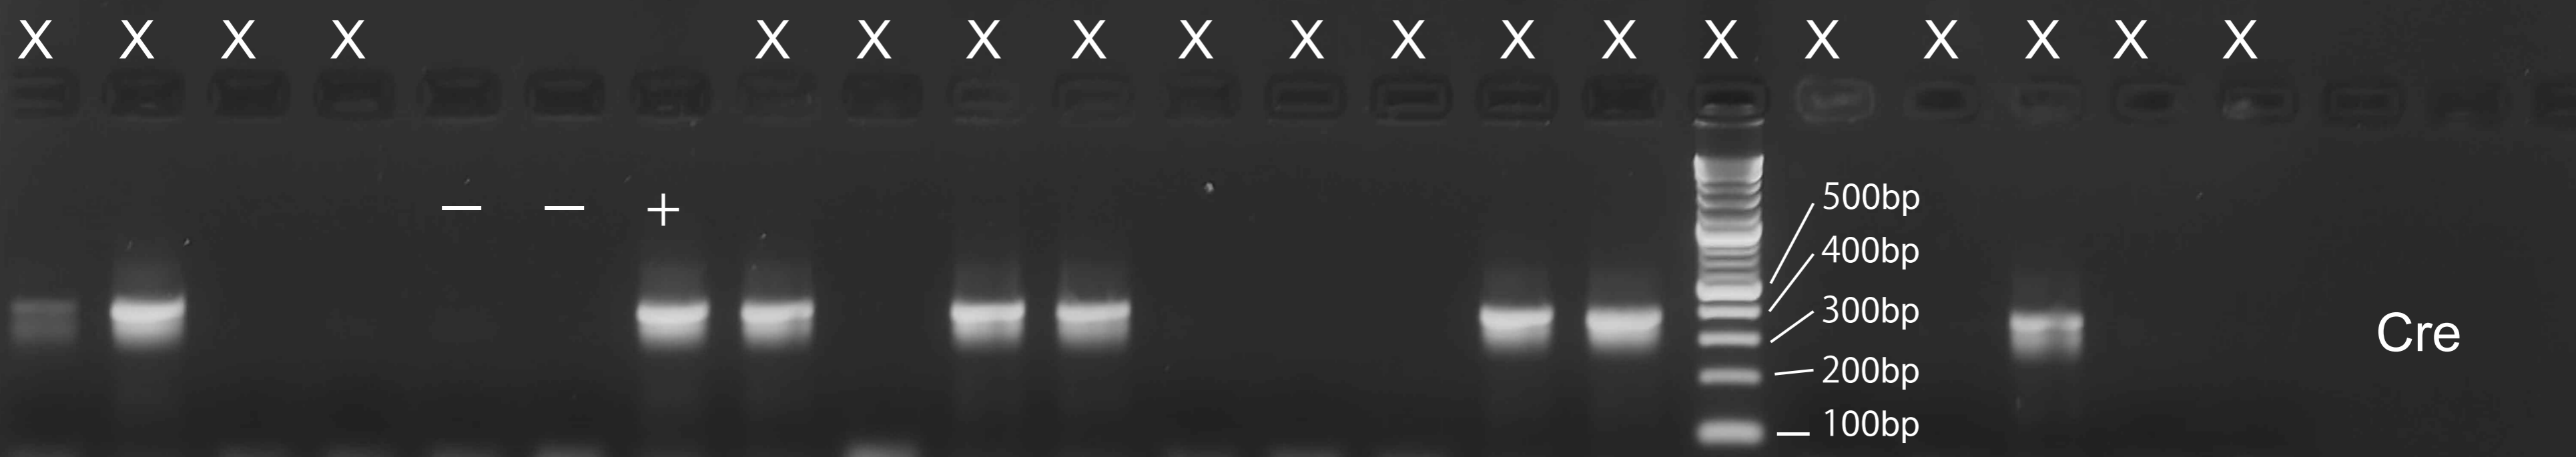

Supplement: pone.0294893.s009.pdf [file pone.0294893.s009.pdf]
